# Supplementary material
Source: PubMed Central journal article supplement (PMC3746196)

B

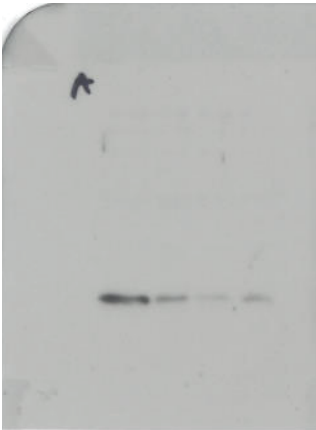

H3K4me3

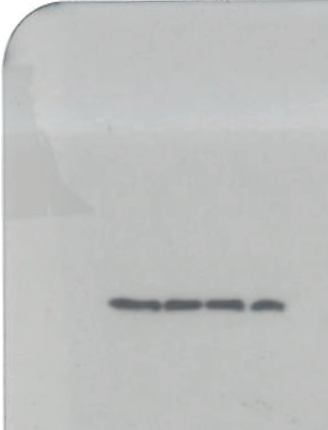

H3

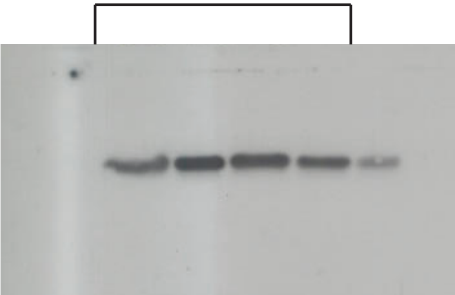

γH2A.X

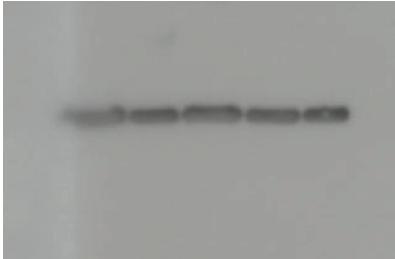

H3

Loading control of γH2A.X Western blot;  
not shown in Fig1B

Supplement: emboj2013159df1.pdf [file emboj2013159df1.pdf]

**A**

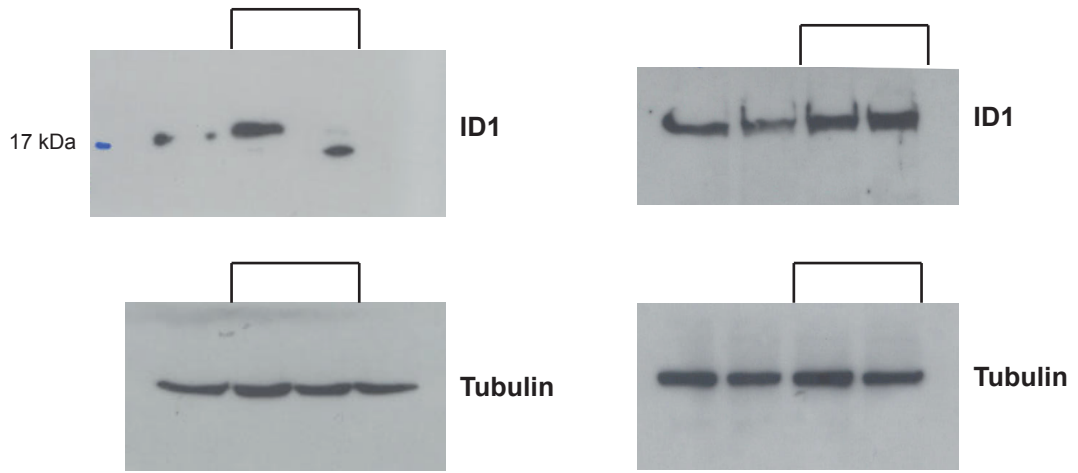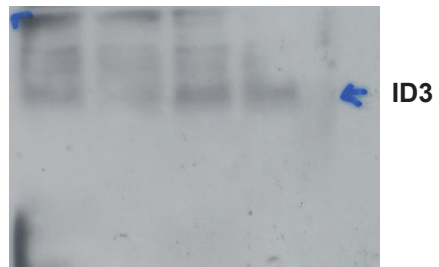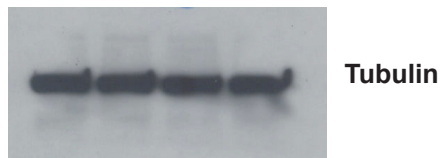

Supplement: emboj2013159df5.pdf [file emboj2013159df5.pdf]

Source File Supplementary Figure 1  
Simboeck et al.

**A**

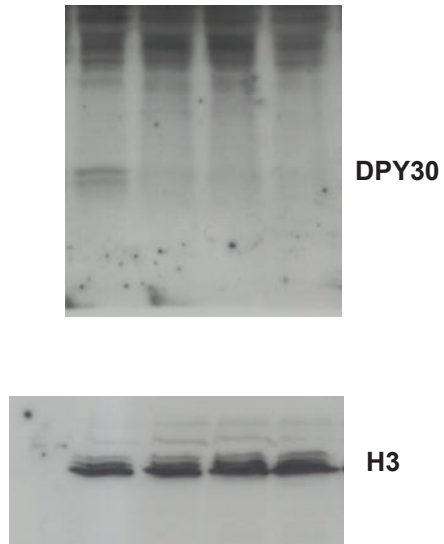

**B**

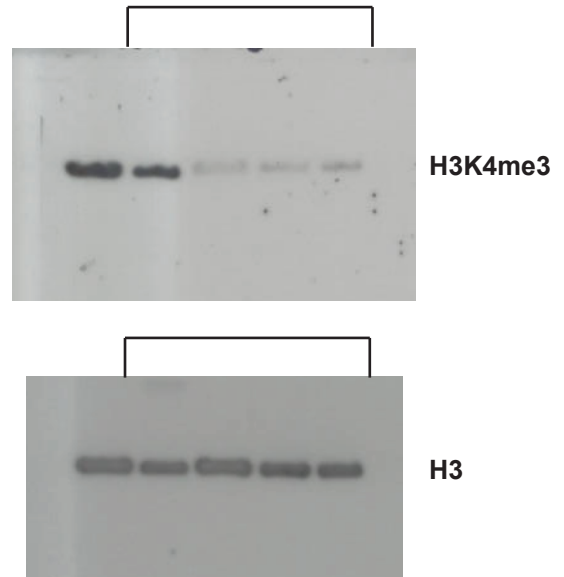

Supplement: emboj2013159dfs1.pdf [file emboj2013159dfs1.pdf]
